# Supplementary material
Source: PubMed Central journal article supplement (PMC4132167)
Supplement: NIHMS580548-supplement-supplement_1.pdf [file NIHMS580548-supplement-supplement_1.pdf]

Table E1. Clinical features of DOCK8 immunodeficient patient cohorts followed at the NIH

|            | Patient | Age (yr) | HPV | MCV | HSV | VZV | EBV | URTI | LRTI | Staph skin infxn | Pneumocystis | Fungal infxn | Severe infxn | Lymphopenia | Specific Abs | Eczema | Asthma | Food allergy | Eosinophilic GI ds | Poor growth | IgE | Eosinophilia | Liver ds | HPV malignancy | Lymphoma | Vascular abnl | AIHA/ITP | Death | Age adjustment | Total score | Viral burden | Atopic burden | Infectious burden | Malignancy |
|------------|---------|----------|-----|-----|-----|-----|-----|------|------|------------------|--------------|--------------|--------------|-------------|--------------|--------|--------|--------------|--------------------|-------------|-----|--------------|----------|----------------|----------|---------------|----------|-------|----------------|-------------|--------------|---------------|-------------------|------------|
|            |         |          |     |     |     |     |     |      |      |                  |              |              |              |             |              |        |        |              |                    |             |     |              |          |                |          |               |          |       |                |             |              |               |                   |            |
| Repaired   | 1       | 29       | 3   | 1   | 0   | 0   | 2   | 1    | 2    | 0                | 0            | 1            | 2            | 2           | 2            | 2      | 2      | 2            | 2                  | 0           | 0   | 1            | 2        | 0              | 0        | 0             | 0        | 0     | 24             | 6           | 6            | 12            | 0                 |            |
|            | 2       | 21       | 3   | 3   | 3   | 0   | 2   | 1    | 1    | 1                | 0            | 0            | 0            | 2           | 2            | 3      | 0      | 2            | 0                  | 2           | 1   | 2            | 2        | 0              | 0        | 2             | 0        | 0     | 32             | 11          | 8            | 14            | 0                 |            |
|            | 3       | 23       | 3   | 3   | 0   | 1   | 0   | 2    | 1    | 0                | 0            | 0            | 0            | 2           | 2            | 1      | 0      | 0            | 0                  | 1           | 1   | 0            | 0        | 0              | 0        | 0             | 0        | 22    | 7              | 5           | 12           | 0             |                   |            |
|            | 4       | 19       | 3   | 3   | 2   | 0   | 0   | 2    | 1    | 0                | 0            | 1            | 2            | 2           | 2            | 2      | 1      | 0            | 0                  | 0           | 1   | 1            | 0        | 0              | 0        | 0             | 0        | 23    | 8              | 5           | 14           | 0             |                   |            |
|            | 5       | 19       | 1   | 3   | 2   | 0   | 0   | 2    | 2    | 1                | 1            | 2            | 0            | 3           | 2            | 2      | 1      | 2            | 3                  | 0           | 1   | 1            | 0        | 0              | 0        | 0             | 0        | 32    | 6              | 10          | 14           | 3             |                   |            |
|            | 6       | 10       | 1   | 0   | 3   | 1   | 2   | 0    | 0    | 1                | 0            | 2            | 0            | 1           | 1            | 3      | 0      | 2            | 0                  | 2           | 1   | 0            | 0        | 0              | 0        | 0             | 0        | 20    | 7              | 6           | 10           | 0             |                   |            |
|            | 7       | 5        | 0   | 0   | 3   | 0   | 0   | 1    | 1    | 1                | 0            | 0            | 2            | 3           | 1            | 3      | 1      | 2            | 3                  | 2           | 1   | 2            | 0        | 0              | 0        | 0             | 0        | 31    | 3              | 12          | 8            | 0             |                   |            |
|            | 8       | 4        | 1   | 0   | 3   | 0   | 0   | 1    | 1    | 1                | 1            | 2            | 2            | 2           | 1            | 3      | 1      | 1            | 0                  | 0           | 1   | 2            | 0        | 0              | 0        | 0             | 0        | 28    | 4              | 8           | 12           | 0             |                   |            |
|            | 9       | 28       | 1   | 0   | 0   | 2   | 0   | 1    | 2    | 1                | 0            | 0            | 0            | 3           | 2            | 3      | 1      | 0            | 0                  | 0           | 1   | 1            | 0        | 0              | 3        | 2             | 0        | 25    | 3              | 6           | 7            | 3             |                   |            |
|            | 10      | 27       | 3   | 0   | 3   | 0   | 2   | 1    | 2    | 0                | 0            | 0            | 0            | 3           | 2            | 0      | 0      | 2            | 0                  | 0           | 1   | 1            | 0        | 2              | 0        | 0             | 0        | 22    | 8              | 4           | 11           | 2             |                   |            |
|            | 11      | 25       | 3   | 0   | 0   | 0   | 2   | 2    | 3    | 0                | 0            | 1            | 0            | 3           | 2            | 0      | 0      | 0            | 0                  | 0           | 2   | 0            | 0        | 0              | 1        | 0             | 0        | 19    | 5              | 0           | 11           | 1             |                   |            |
|            | 12      | 6        | 0   | 0   | 3   | 0   | 2   | 2    | 2    | 1                | 1            | 1            | 2            | 1           | 1            | 2      | 1      | 0            | 0                  | 0           | 0   | 2            | 0        | 0              | 0        | 0             | 0        | 21    | 5              | 5           | 14           | 0             |                   |            |
|            | 13      | 18       | 3   | 0   | 0   | 0   | 2   | 2    | 2    | 1                | 0            | 2            | 2            | 3           | 2            | 2      | 0      | 2            | 0                  | 0           | 1   | 1            | 0        | 0              | 0        | 0             | 0        | 23    | 3              | 6           | 12           | 0             |                   |            |
|            | 14      | 18       | 3   | 3   | 0   | 0   | 2   | 0    | 1    | 1                | 0            | 0            | 0            | 1           | 1            | 2      | 0      | 0            | 0                  | 0           | 1   | 1            | 0        | 0              | 0        | 0             | 0        | 16    | 8              | 4           | 10           | 0             |                   |            |
|            | 15      | 16       | 1   | 1   | 0   | 0   | 2   | 3    | 2    | 0                | 0            | 0            | 0            | 1           | 2            | 2      | 0      | 0            | 0                  | 0           | 1   | 1            | 0        | 0              | 3        | 0             | 0        | 19    | 4              | 4           | 9            | 3             |                   |            |
|            | 16      | 17       | 3   | 0   | 0   | 0   | 2   | 2    | 1    | 0                | 1            | 0            | 2            | 3           | 2            | 0      | 0      | 0            | 0                  | 0           | 0   | 0            | 0        | 0              | 3        | 0             | 0        | 17    | 3              | 0           | 9            | 3             |                   |            |
|            | 17      | 11       | 3   | 0   | 2   | 0   | 0   | 2    | 1    | 0                | 0            | 1            | 0            | 2           | 1            | 2      | 0      | 0            | 0                  | 0           | 0   | 0            | 0        | 0              | 0        | 0             | 0        | 14    | 5              | 2           | 9            | 0             |                   |            |
| Unrepaired | 18      | 21       | 3   | 0   | 0   | 1   | 2   | 2    | 1    | 0                | 0            | 2            | 3            | 2           | 2            | 1      | 2      | 2            | 0                  | 1           | 2   | 0            | 3        | 0              | 0        | 0             | 2        | 31    | 4              | 10          | 11           | 3             |                   |            |
|            | 19      | 18       | 1   | 0   | 2   | 2   | 2   | 2    | 1    | 0                | 2            | 2            | 2            | 2           | 2            | 0      | 1      | 0            | 2                  | 2           | 0   | 1            | 0        | 0              | 0        | 0             | 0        | 28    | 7              | 6           | 16           | 0             |                   |            |
|            | 20      | 10       | 1   | 1   | 2   | 0   | 0   | 3    | 1    | 1                | 0            | 1            | 2            | 3           | 2            | 3      | 1      | 1            | 0                  | 0           | 1   | 2            | 0        | 0              | 0        | 0             | 0        | 28    | 4              | 8           | 12           | 0             |                   |            |
|            | 21      | 8        | 0   | 0   | 2   | 0   | 0   | 2    | 2    | 1                | 1            | 1            | 2            | 3           | 2            | 2      | 0      | 1            | 0                  | 2           | 1   | 2            | 2        | 0              | 0        | 0             | 2        | 28    | 2              | 6           | 11           | 0             |                   |            |
|            | 22      | 8        | 1   | 0   | 2   | 0   | 2   | 1    | 2    | 1                | 0            | 0            | 0            | 3           | 2            | 3      | 1      | 1            | 0                  | 2           | 1   | 2            | 0        | 0              | 0        | 0             | 0        | 24    | 5              | 8           | 9            | 0             |                   |            |
|            | 23      | 6        | 0   | 0   | 2   | 0   | 2   | 1    | 1    | 1                | 0            | 0            | 0            | 2           | 3            | 1      | 1      | 0            | 2                  | 1           | 2   | 0            | 0        | 0              | 0        | 0             | 0        | 21    | 4              | 8           | 7            | 0             |                   |            |
|            | 24      | 2        | 0   | 0   | 2   | 0   | 0   | 0    | 0    | 1                | 0            | 1            | 0            | 1           | 1            | 2      | 0      | 1            | 0                  | 2           | 1   | 2            | 0        | 0              | 0        | 0             | 0        | 18    | 2              | 6           | 4            | 0             |                   |            |
|            | 25      | 14       | 3   | 0   | 0   | 0   | 0   | 2    | 1    | 1                | 0            | 1            | 2            | 2           | 2            | 3      | 1      | 1            | 0                  | 0           | 1   | 2            | 0        | 0              | 0        | 0             | 0        | 22    | 3              | 8           | 10           | 0             |                   |            |
|            | 26      | 6        | 0   | 1   | 0   | 1   | 0   | 0    | 1    | 1                | 1            | 2            | 2            | 3           | 2            | 3      | 1      | 2            | 0                  | 2           | 1   | 1            | 2        | 0              | 0        | 0             | 0        | 26    | 2              | 8           | 9            | 0             |                   |            |
|            | 27      | 13       | 0   | 3   | 0   | 2   | 2   | 1    | 2    | 1                | 0            | 0            | 2            | 3           | 2            | 2      | 1      | 0            | 3                  | 2           | 1   | 2            | 0        | 0              | 0        | 2             | 0        | 31    | 7              | 9           | 13           | 0             |                   |            |
|            | 28      | 9        | 0   | 0   | 2   | 0   | 0   | 2    | 2    | 0                | 0            | 2            | 2            | 1           | 0            | 2      | 0      | 2            | 0                  | 2           | 1   | 2            | 2        | 0              | 0        | 0             | 0        | 22    | 2              | 7           | 10           | 0             |                   |            |
|            | 29      | 8        | 0   | 3   | 0   | 0   | 0   | 2    | 2    | 1                | 1            | 0            | 0            | 3           | 2            | 3      | 0      | 2            | 0                  | 2           | 1   | 2            | 0        | 0              | 0        | 0             | 0        | 24    | 3              | 8           | 9            | 0             |                   |            |

The patients' mutational analyses are shown in Table 1 for those with somatic repair, and in Table 2 for those incapable of somatic repair.

Five additional patients in the NIH cohort were not included in this analysis because of insufficient material to determine whether they showed any somatic repair.

Key to scores:

Age: Age at last evaluation, time of transplant or death.

HPV/MCV: 0=none; 1=localized; 2=disseminated

HSV: 0=none; 1=severe primary disease excluding keratitis; 2=recurrent HSV>3x/year or on chronic prophylaxis; 3=keratitis or systemic infection

VZV: 0=none; 1=severe primary or zoster once; 2=recurrent zoster

EBV: 0=no viremia; 2=persistent EBV viremia (>2 episodes)

URTI: 1=URI>4 episodes/year; 2=myringotomy tubes or sinus surgery; 3=mastoiditis or invasive disease complicating sinusitis

LRTI: 1=pneumonia/bronchitis>1 episode; 2=bronchiectasis; 3=baseline oxygen requirement

SSTI: 1=cellulitis or skin abscess

Pneumocystis: 1=infection

Fungal infxn: 0=none; 1=recurrent oral/vaginal; 2=finger nail; 3=disseminated histoplasmosis/cryptococcus/coccidioides

Severe infection: 0=none; 2= present

Lymphopenia: 0=none; 1=CD4 lymphopenia; 2=CD8 lymphopenia; 3=NK lymphopenia

Specific abs: 0=normal responses; 1=abnormal polysaccharide pneumococcal response; 2=abnormal protein conjugate response

Eczema: at worse stage, 0=absent; 1=mild; 2=moderate; 3=severe

Food allergy: 0=no food allergy; 1=food allergy; 2=food allergy with anaphylaxis

Eosinophilic GI disease: 0=none; 2=esophagitis; 3=GI tract beyond esophagus

Poor growth: 2=<5th percentile for weight and/or height

IgE: 0=normal; 2=elevated serum IgE

Eosinophilia: 0=<600/uL; 1=600-5000/uL; 2=>5000/uL

Liver disease: 2=persistent AST/ALT>2x upper limits of normal; 3=sclerosing cholangitis

HPV malignancy: 0=absent; 1=dysplasia; 2=localized squamous cell carcinoma; 3=metastatic squamous cell carcinoma

Lymphoma: 3=present; 4= relapse

Vascular abnormality: 2=arterial dilation, calcification or vasculitis

AIHA/ITP: 2= hemolytic anemia and/or ITP

Death: 2= by age 30; 3= by age 20; 4=by age 10

Age adjustment: add 5 points for age 5 or less

**Table E2.** Primer sets used in this study (5' to 3')

| <b>Amplicon</b>                                     | <b>Forward Primer Sequence</b> | <b>Reverse Primer Sequence</b> |
|-----------------------------------------------------|--------------------------------|--------------------------------|
| <b>DOCK8 cDNA sequencing</b>                        |                                |                                |
| DOCK8cDNA4-836                                      | TTTGTCTCCTGTAACAATTTACGC       | TTGAACTGGTCAGAGTTCAGG          |
| DOCK8cDNA736-1503                                   | AAATTGAGCCCCTGTTTGC            | TTTCAGGAAAGGGTTTCACG           |
| DOCK8cDNA1400-2162                                  | CAAGTCAATTCCAGGCTTGC           | GAAGGTCACCTGGCTCTCC            |
| DOCK8cDNA2090-2869                                  | TGTACACACCCAGGACAACC           | ACCAGAAGCTCAAAGAAGAACC         |
| DOCK8cDNA2772-3533                                  | CATTTCCATGAGGAGCTTGC           | GGCGATTTTGACCTTCACC            |
| DOCK8cDNA3467-4197                                  | CAGCCTGCTAAGTTCTCACG           | TGCTTCTGTAGCCAGATTGC           |
| DOCK8cDNA4113-4851                                  | CGGCAAGCTAATGAGAAGC            | GTTTCTCTGCCATGTTCTGG           |
| DOCK8cDNA4729-5503                                  | TGAAAATGAGGGAATTCAGG           | TCCACAAAAGTGATCTGTATGTAGG      |
| DOCK8cDNA5463-6183                                  | TTTTGGTGCAGAATTTGTGG           | ACAACTGGGTTTCACATTTCC          |
| DOCK8cDNA6114-7014                                  | TTCAGAGTTGAGAGTCAAAGAGG        | AGAAACTTGGTCCCAGAGAGG          |
| <b>mRNA splicing analyses in Patients 16 and 17</b> |                                |                                |
| Exon 2-Exon 13                                      | AGGACTTTGCAGCCCTCTTTGCC        | TTTCAGGAAAGGGTTTCACG           |
| Exon 23-Exon 24                                     | GTGAGAGAAACAGTCTTCAAG          | TGGTTTTTACTAAAAGGGCTG          |
| <b>cDNA cloning for SNP analyses in Patient 12</b>  |                                |                                |
| Exon 32-Exon 34                                     | CCGATTTCCAGGCCTAAATG           | TGCAGTGGTGCAGGACTTGG           |

**Table E3.** *DOCK8* mutational analyses in the NIH patients incapable of somatic repair

| Patient | Germline mutations                                                                                 | Nomenclature                                                                                      |
|---------|----------------------------------------------------------------------------------------------------|---------------------------------------------------------------------------------------------------|
| 18      | Homozygous large deletion (exons 5 to 24)                                                          | Chr9:g.301,734_388,139del, c.426_3017, p.109A_972Kdel                                             |
| 19      | Homozygous large deletion (exons 28 to 35)                                                         | Chr9:g.414,668_430,067 del                                                                        |
| 20      | Homozygous large deletion (exons 5 to 9)                                                           | Chr9:g.(300,972_391,582)_(323,232_323,291)del, c.325_921del, p.A109_K307del                       |
| 21      | Homozygous large deletion (exons 10 to 23)                                                         | Chr9:g.333,830_394,034del, c.921_2765del, p.308S_922Ldel                                          |
| 22      | Homozygous small indel (exon 13)                                                                   | c.1325_1326delTG, p.L442RfsX16                                                                    |
| 23      |                                                                                                    |                                                                                                   |
| 24      |                                                                                                    |                                                                                                   |
| 25      | Large deletion (exons 1 to 45) + small indel with frameshift mutation (exon 17)                    | Chr9:g.271,361_452,291del, plus Chr9:g.372,260_272,348del89                                       |
| 26      |                                                                                                    |                                                                                                   |
| 27      | Large deletion (exons 3 to 25) + large deletion (exons 22 to 32), with overlap from exons 22 to 25 | Chr9:g.(287,561_287,591)_(399,673_399,716)del, plus Chr9:g.(381,489_390,463)_(421,985_434,742)del |
| 28      | Large deletion (exons 39 to 47) + small indel with frameshift mutation (exon 45)                   | Chr9:g.439,006_465,450del, plus c.5815_5816insT, p.Y1939LfsX12                                    |
| 29      | Large deletion (exons 1 to 47) + splicing mutation (exon 6)                                        | Chr9:g.214,340_465,450del, plus c.623+1G>A, p.E180VfsX4                                           |

Germline mutational analyses were performed on genomic DNA isolated from neutrophils, and in some cases also *Herpesvirus saimiri*-transformed T cells or Epstein-Barr Virus-transformed B cells. Parenthetical information indicates where the mutation is located. Genomic sequencing was also performed on both parents to establish that the patients' mutations were inherited on different alleles, except for Patients 20, 27, 28, and 29, whose fathers' DNA was unavailable.

**Table E4.** Somatic repair in PBMC subsets from Patients 10 and 11

|            | Cells                                        | # clones wildtype (wt) | # clones with indel mutation | wt/indel | % of cells with repaired genotype |
|------------|----------------------------------------------|------------------------|------------------------------|----------|-----------------------------------|
| Patient 10 | CD4 <sup>+</sup> T cells                     | 69                     | 24                           | 2.9      | 48                                |
|            | CD4 <sup>+</sup> CD45RA <sup>+</sup> T cells | 48                     | 40                           | 1.2      | 9                                 |
|            | CD4 <sup>+</sup> CD45RO <sup>+</sup> T cells | 78                     | 12                           | 6.5      | 73                                |
|            | CD8 <sup>+</sup> T cells                     | 68                     | 11                           | 6.2      | 72                                |
|            | CD8 <sup>+</sup> CD45RA <sup>+</sup> T cells | 79                     | 9                            | 8.8      | 80                                |
|            | CD8 <sup>+</sup> CD45RO <sup>+</sup> T cells | 81                     | 8                            | 10.1     | 82                                |
|            | CD19 <sup>+</sup> B cells                    | 53                     | 41                           | 1.3      | 13                                |
|            | CD56 <sup>+</sup> CD3 <sup>-</sup> NK cells  | 49                     | 46                           | 1.1      | 3                                 |
|            | CD14 <sup>+</sup> Monocytes                  | 40                     | 53                           | 0.8      | -14                               |
|            | Fibroblasts                                  | 47                     | 45                           | 1.0      | 2                                 |
| Patient 11 | CD4 <sup>+</sup> T cells                     | 55                     | 23                           | 2.4      | 41                                |
|            | CD4 <sup>+</sup> CD45RA <sup>+</sup> T cells | 57                     | 36                           | 1.6      | 23                                |
|            | CD4 <sup>+</sup> CD45RO <sup>+</sup> T cells | 70                     | 20                           | 3.5      | 57                                |
|            | CD8 <sup>+</sup> T cells                     | 78                     | 10                           | 7.8      | 77                                |
|            | CD8 <sup>+</sup> CD45RA <sup>+</sup> T cells | 65                     | 24                           | 2.7      | 46                                |
|            | CD8 <sup>+</sup> CD45RO <sup>+</sup> T cells | 80                     | 9                            | 8.9      | 80                                |
|            | CD19 <sup>+</sup> B cells                    | 30                     | 26                           | 1.2      | 7                                 |
|            | CD56 <sup>+</sup> CD3 <sup>-</sup> NK cells  | 55                     | 38                           | 1.4      | 18                                |
|            | CD14 <sup>+</sup> Monocytes                  | 44                     | 29                           | 1.5      | 20                                |
|            | Fibroblasts                                  | 39                     | 38                           | 1.0      | 1                                 |

Leukocyte subsets from Patients 10 and 11 were purified from PBMC by fluorescence-activated cell sorting, and their genomic DNAs isolated. As a control, primary fibroblast cell lines, which do not normally express DOCK8 protein,<sup>E1</sup> were also established from skin biopsies for similar analyses. A short sequence encompassing the small indel mutation in exon 12 (c.1266delC) was PCR amplified for 25 cycles and cloned. Plasmid DNA containing cloned products were isolated from transformed bacteria. At least 56 transformant colonies were analyzed for the presence or

absence of the indel by sequencing. Colony counts were used to calculate estimated proportions of cells having a repaired genotype, as follows:

# unrepaired cells having indel/wt genotype = # clones indel

# repaired cells having wt/wt genotype = [(# clones wt) – (# clones indel)]/2

% repaired cells = (# repaired cells)/[(# unrepaired cells) + (# repaired cells)] \*100

When compared to flow cytometric detection of DOCK8-expressing cells, this methodology underestimated the proportions of repaired T cells and overestimated the proportions of repaired B and NK cells.

## REFERENCE

E1. Su HC, Jing H, Zhang Q. DOCK8 deficiency. *Ann N Y Acad Sci* 2011; 1246:26-33.

## A Germline missense mutations cause abnormal splicing in Patient 1: c.1214A>G, p.K405RfsX15

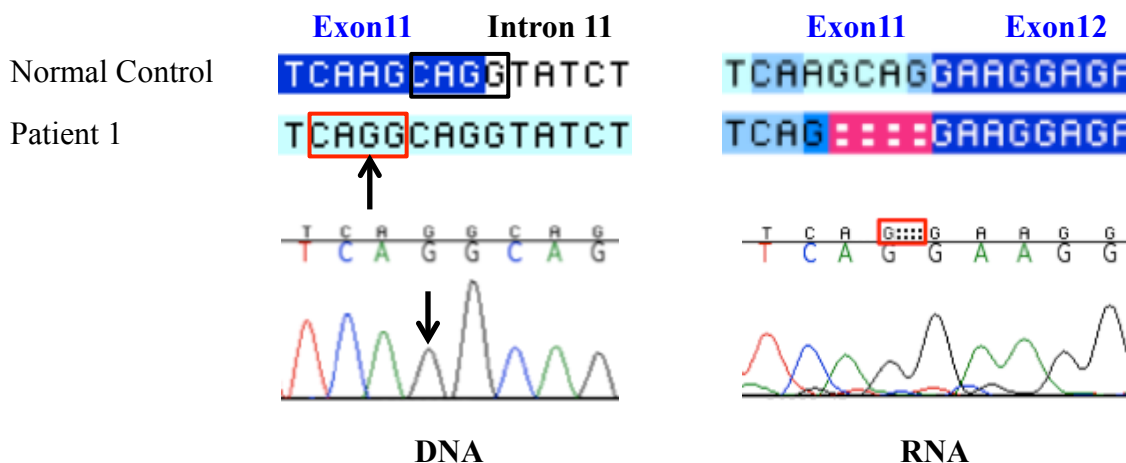

## B Somatic mutations in Patient 1 abolish the new splice donor site in revertant T cells and NK cells

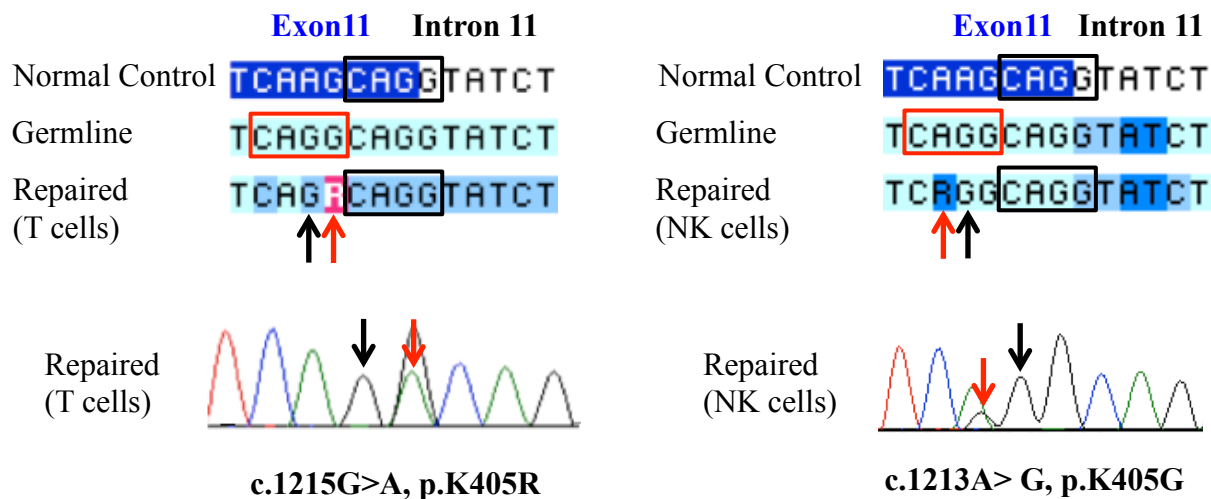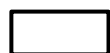

Normal splicing donor site CAG|G

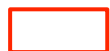

Cryptic splicing donor site CAG|G

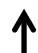

Germline mutation

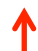

Somatic mutation

**Figure E2**

**A** Germline homozygous nonsense mutation in Patient 6:  
c.2044G>T, p.E682X (Exon 19)

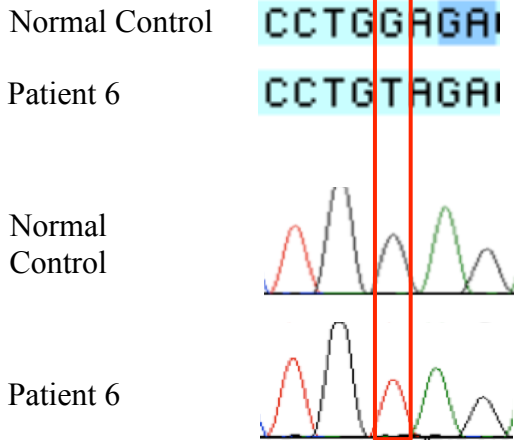

**B** Germline homozygous nonsense mutation in Patients 7 and 8:  
c.5182C>T, p.R1728X (Exon 41)

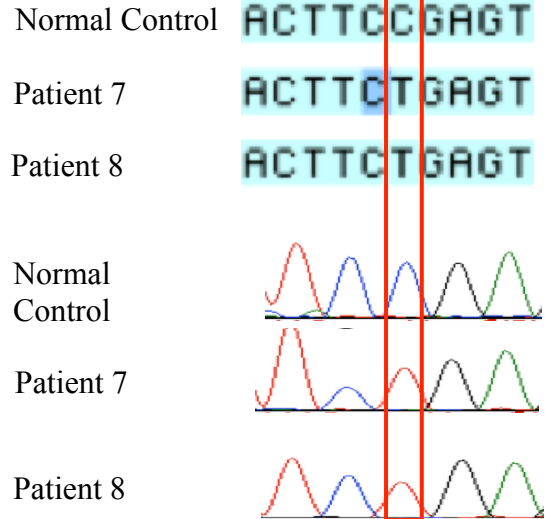

**Figure E3**

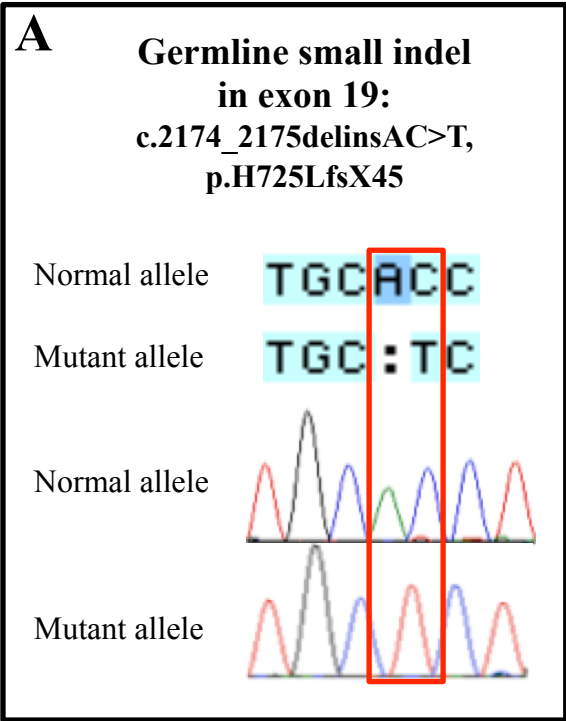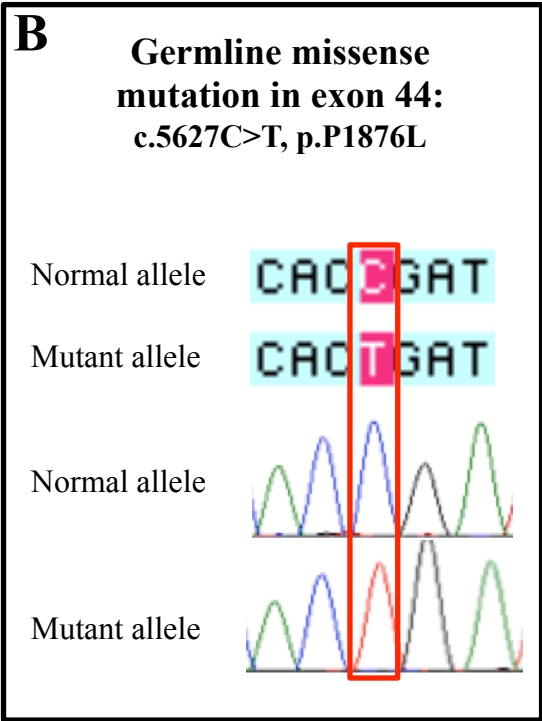



**Figure E4**

**A Germline large heterozygous deletion from exon 21 to end of the gene in Patients 10 and 11**

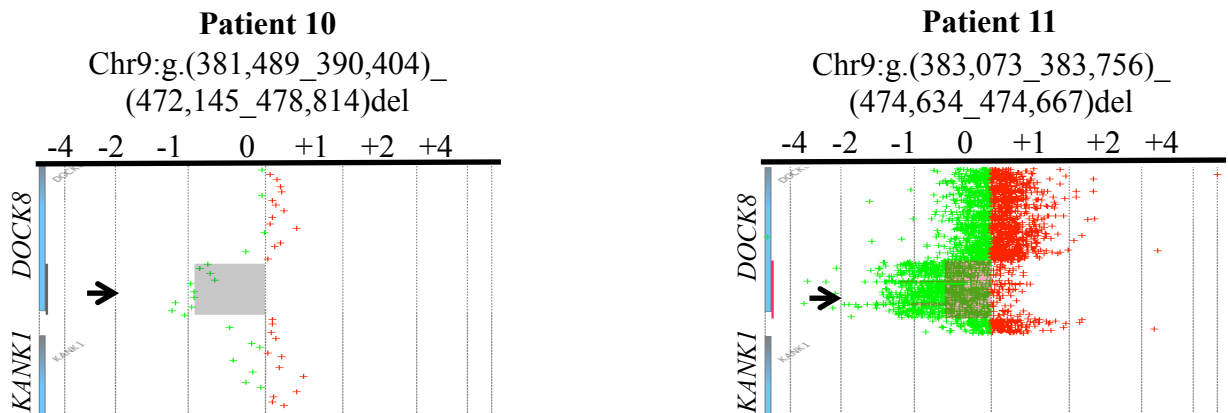

**B Germline small indel in exon 12:  
c.1266delC, p.W423TfsX18**

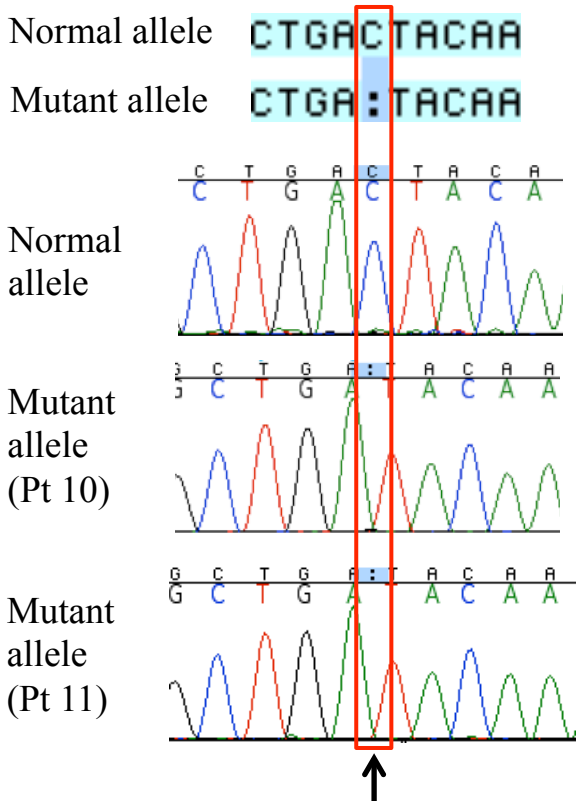

**C Repair of the small indel in T cells**

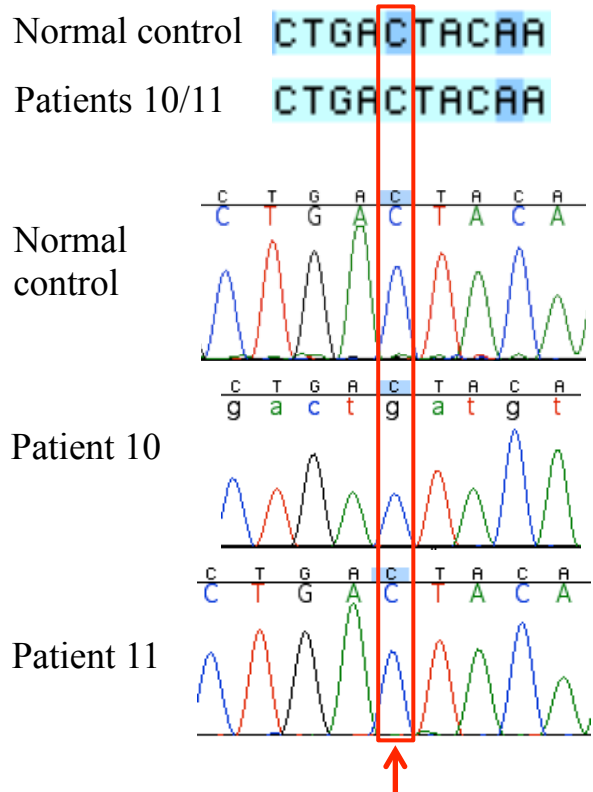

**Figure E5**

**A Germline large heterozygous deletion from promoter to exon 13:**

Chr9:g.(1\_163,131)\_(368,288\_368,361)del

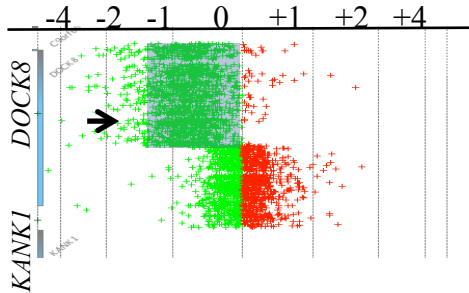

**B Germline small indel in exon 32:**

c.4031\_4032insT, p.D1344RfsX2

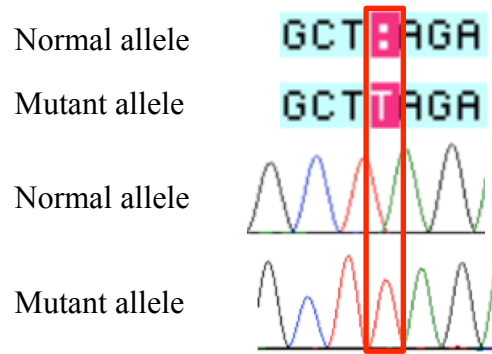

**C No change at genomic DNA level in T cells, suggesting intragenic crossover**

Indel: c.4031\_4032insT, p.D1344RfsX2

SNP: c.4263C>T, p. I1421I

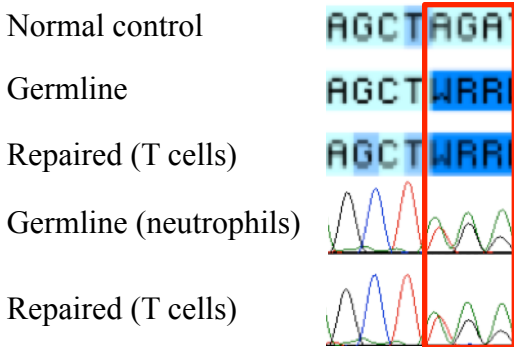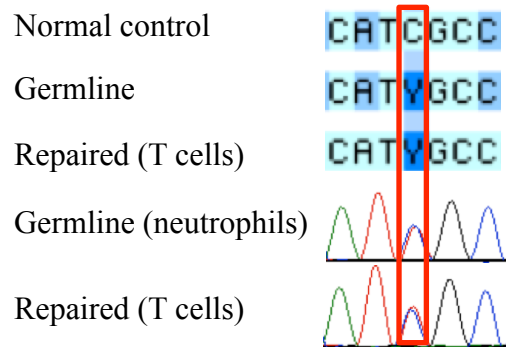

**D cDNA sequencing indicated that the small indel was repaired by intragenic crossover**

Germline genotype

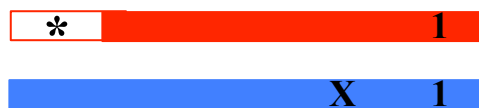

Intragenic single crossover

Intragenic double crossover

Repaired genotype (T cells)

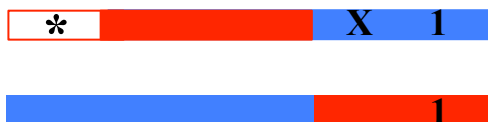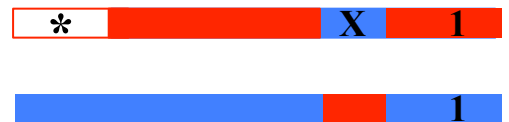

mRNA (majority)

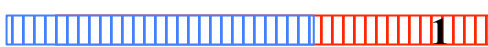

mRNA (minority)

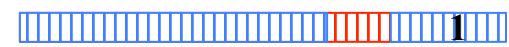

\*: large deletion

1: c.4263C>T, p. (=)

X: c.4031\_4032insT, p.D1344RfsX2

Maternal allele: C

Paternal Allele: T

**Figure E6**

**A Splicing mutation unchanged at the genomic DNA level**

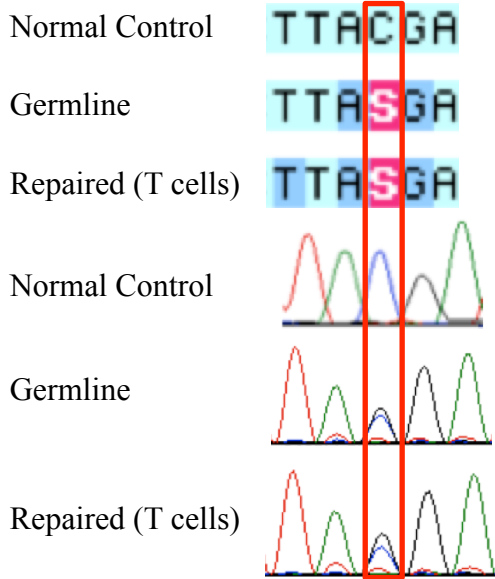

**B Two possible mechanisms for somatic repair**

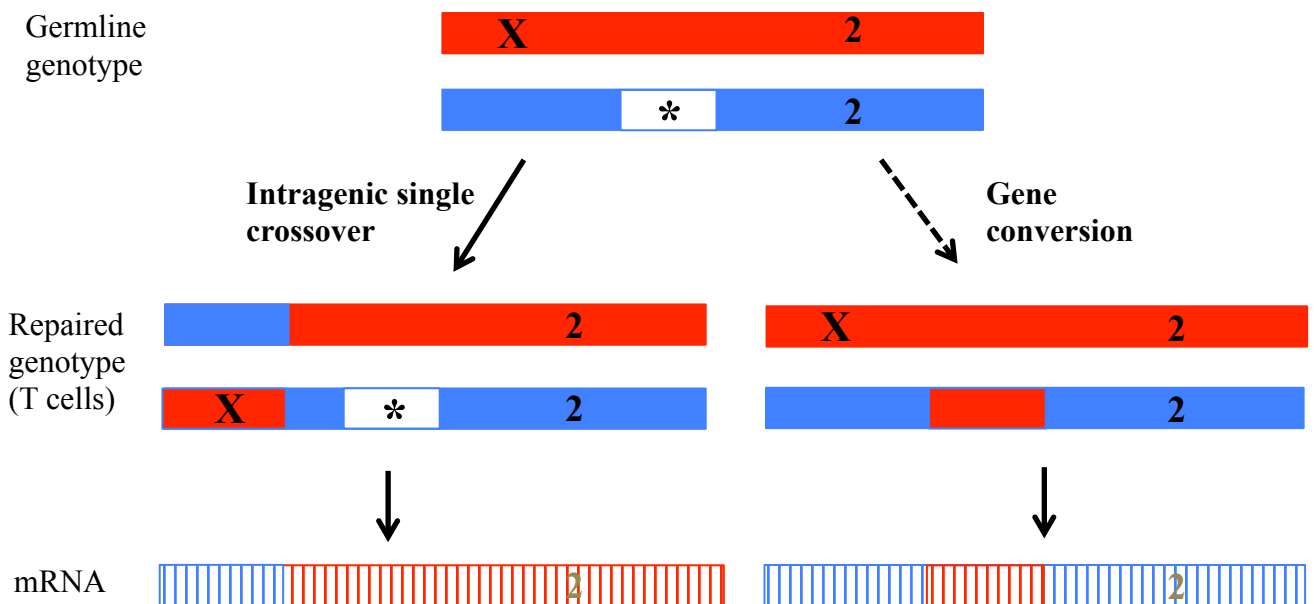

\* : Chr9:g.(340,142\_356,076)\_(405,056\_416,292) del (exons 13-26)

X: c.538-18C>G, p.E180VfsX4

2: rs2297079, heterozygous (C/G) in Patient

**Figure E7**

**A Germline heterozygous nonsense mutation in Patients 14 and 15: c.1805G>A, p.W602X (exon 17)**

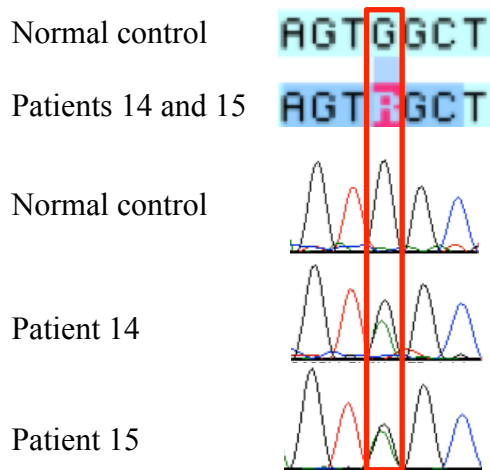

**B Germline heterozygous indel in Patients 14 and 15: c.4540delG, p.E1514KfsX8 (exon 36)**

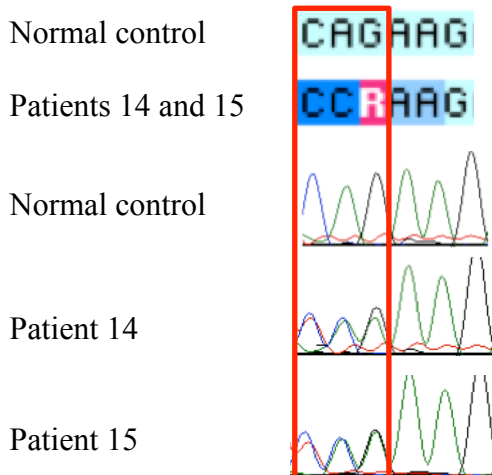

**C Genomic DNA sequencing in Patient 14 indicate that different gene conversion events repaired the *DOCK8* mutant alleles in T cells and NK cells**

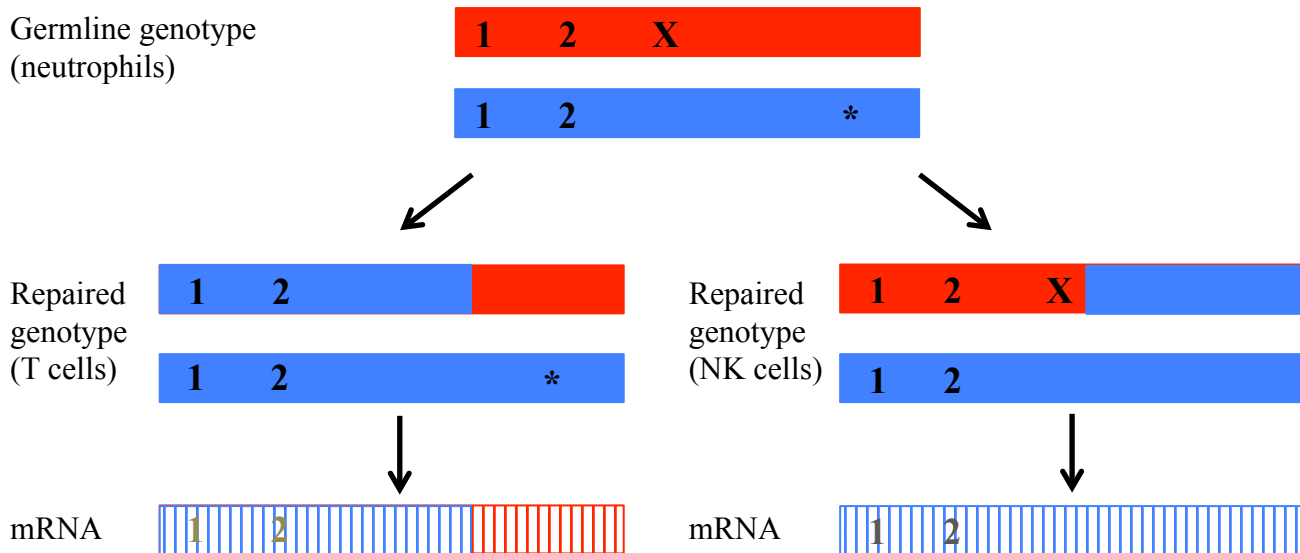

| Marker | Position   | Maternal | Paternal |                             |
|--------|------------|----------|----------|-----------------------------|
| 1      | rs529208   | C        | G        | X: c.1805G>A, p.W602X       |
| 2      | rs10970979 | G        | A        | *: c.4540delG, p.E1514KfsX8 |

# Figure E8

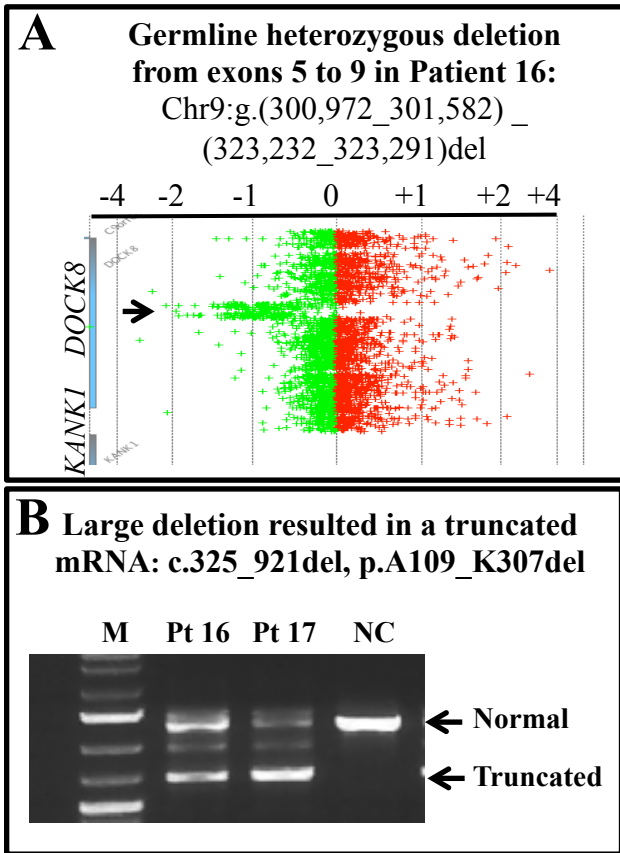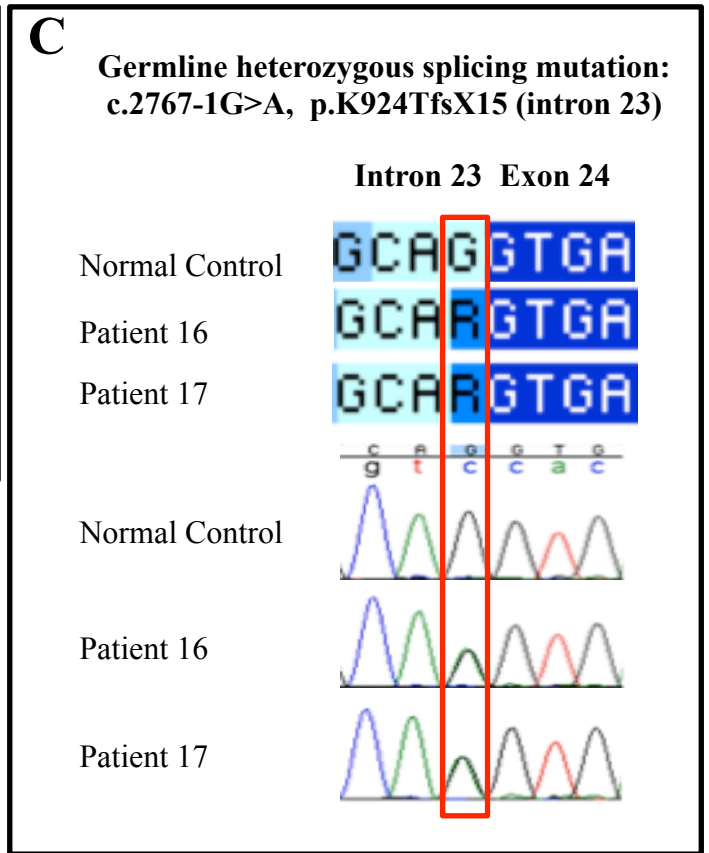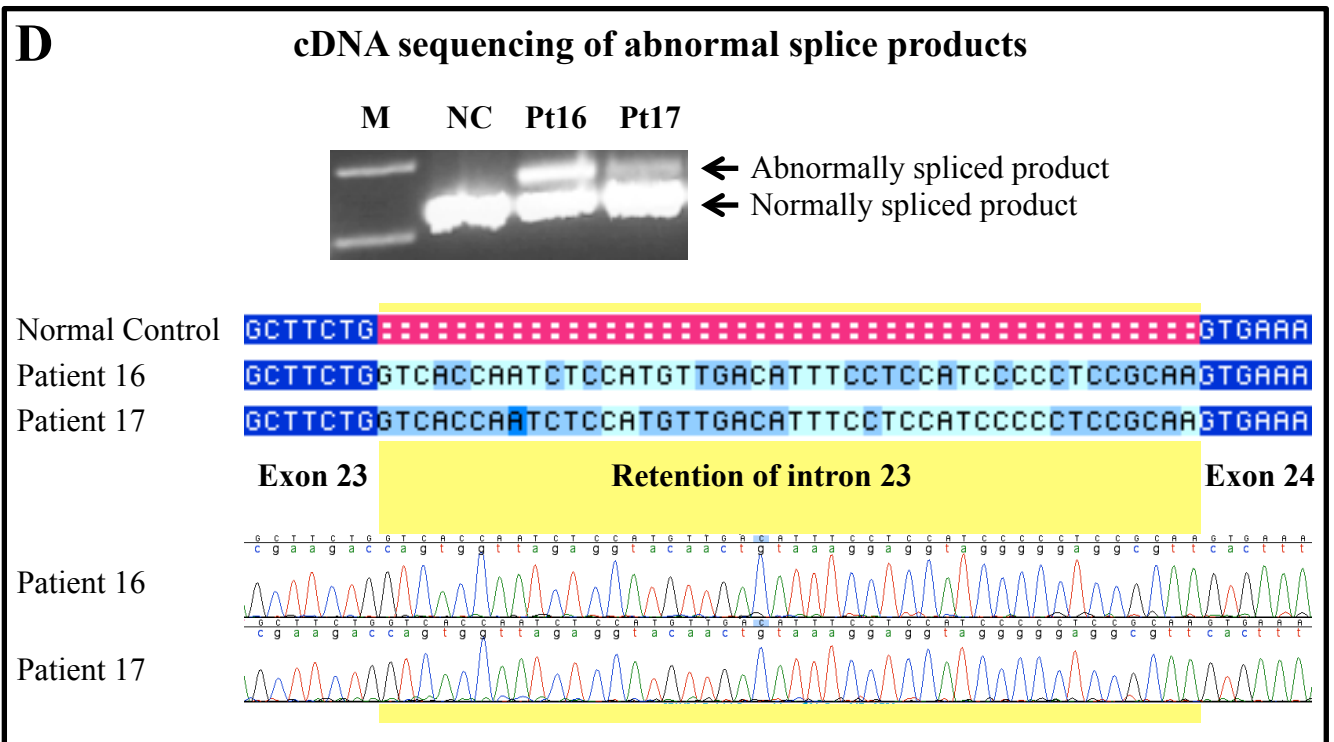

Figure E8

**E** Genomic DNA sequencing showed repair of the splicing mutation in Patient 17 but not Patient 16

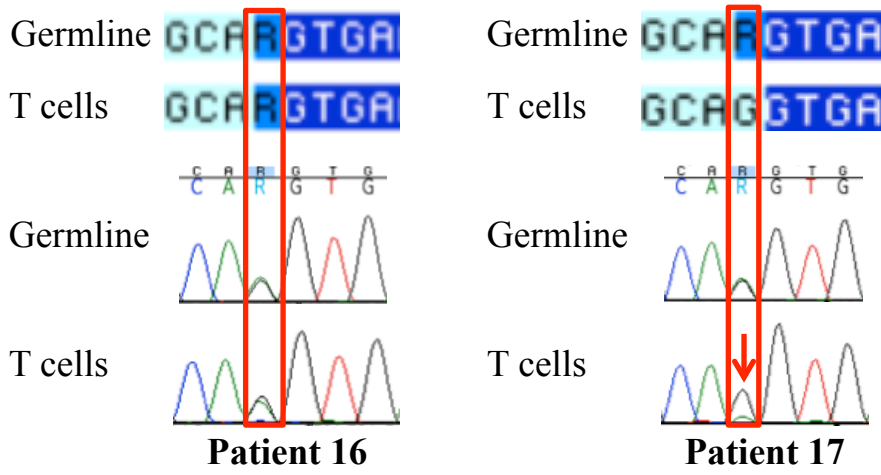

**F** Mechanisms for somatic repair differ between Patients 16 and 17

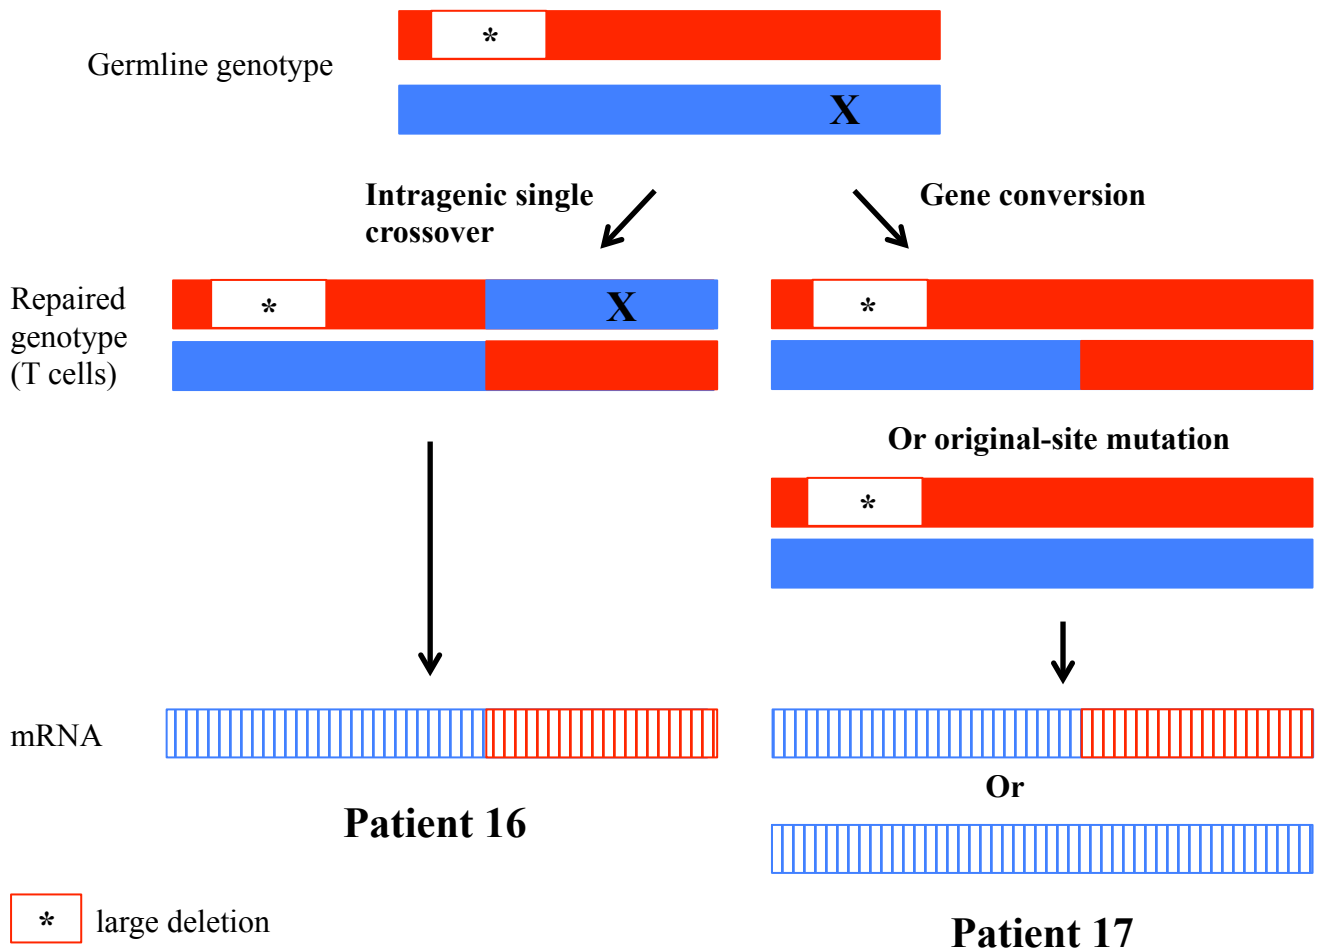

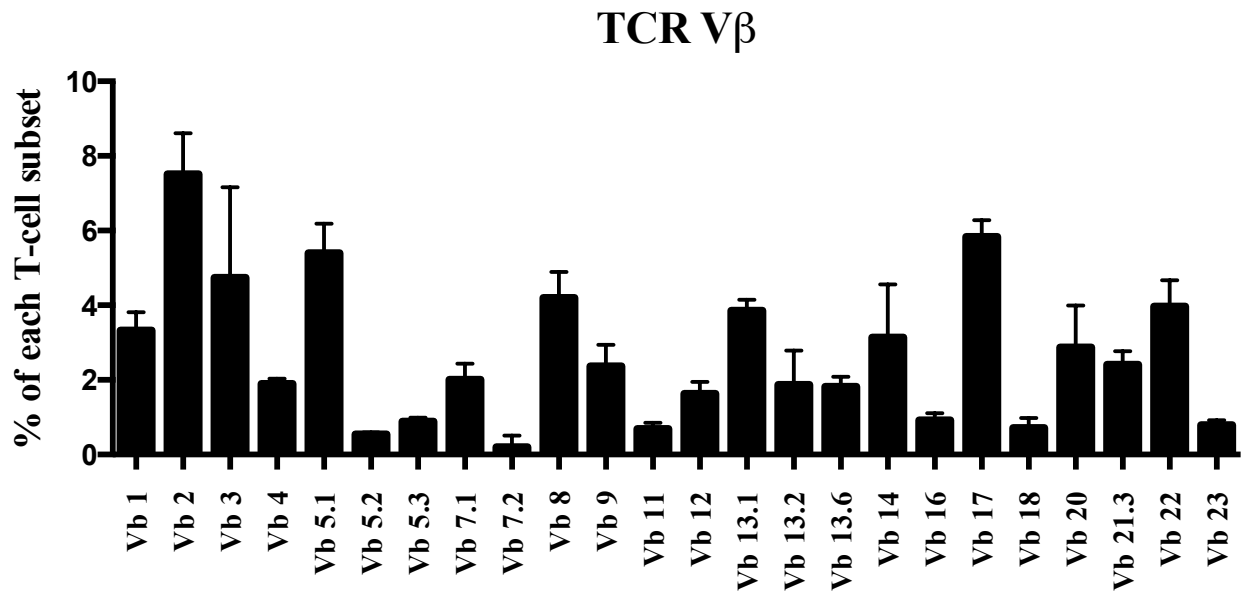

## Online Repository Materials

## METHODS

**Information regarding study subjects can be found in the Methods section in this article's main text.**

### Cells

Peripheral blood mononuclear cells (PBMC) and cell purifications were prepared as described.<sup>E1</sup> In some cases, lymphocyte subsets were separated by fluorescence-activated cell sorting using a BD FACSAria Fusion cell sorter, after staining with fluorescence-conjugated anti-human CD3, CD4, CD8, CD19, CD45RA, CD56 (all from BD Biosciences), and CCR7 (R & D Systems) antibodies. Isolated populations had purities  $\geq 99\%$ , with viabilities of  $>99\%$ . Fibroblast cultures were established from skin punch biopsies. Tissues were incubated overnight with Dispase (BD Biosciences) to separate the dermis from epidermis. Minced pieces of dermis were cultured in DMEM medium supplemented with 10% fetal bovine serum (FBS) for 1 to 2 weeks, when fibroblasts emerged.

### Array comparative genomic hybridization

Comparative genomic hybridization (CGH) analyses were performed on standard human 1 x 244K microarrays (Agilent) as described.<sup>E1</sup> In some cases, we used customized human 8 x 15K



SurePrint HD microarrays, which were designed using Agilent's eArray application. For each customized microarray, 3,666 unique 60-mer probes covered the *DOCK8* gene from chromosome 9 positions 0 to 500,000, with an average density of 12 probes per kb.

### **Immunoblotting**

Preparation of cell lysates, separation and transfer of proteins, and immunoblotting for DOCK8 proteins were performed as described,<sup>E1, E2</sup> except that cells were lysed in 2% SDS buffer and 30  $\mu$ g of protein lysate were separated per lane. Blots were probed using polyclonal rabbit anti-DOCK8 and mouse anti- $\beta$ -actin antibodies (Sigma-Aldrich).

### **Flow cytometry**

Flow cytometry was performed as described.<sup>E1</sup> Fluorescence-conjugated anti-human CD3, CD4, CD8, CD19, CD45RA, CD56, TCR $\gamma\delta$  (all from BD Biosciences), and CCR7 (R & D Systems) antibodies were also used for cell surface staining. T-cell receptor V $\beta$  repertoire analysis was performed using the IOTest beta Mark TCR V kit, per manufacturer's recommendations (Beckman Coulter). For intracellular flow cytometric detection of DOCK8 protein, PBMC were stained for surface molecules before fixation and permeabilization using the Cytotfix/Cytoperm kit (BD Biosciences). Mouse anti-DOCK8 monoclonal antibody clone G2 (Santa Cruz Biotechnology) and purified mouse IgG1 isotype control (Biolegend) were non-covalently labeled using the Zenon® Alexa Fluor® 647 mouse IgG1 kit (Invitrogen). For labeling, each  $\mu$ g of antibody was incubated for 10 min with addition of 10  $\mu$ L of labeling component A and then

10  $\mu$ L of blocking component B. Fixed cells were resuspended in perm/wash buffer and incubated with the freshly labeled anti-DOCK8 antibodies for 1 h at 4 °C in the dark. Cells were washed with perm/wash buffer and PBS, resuspended in PBS, and acquired on the flow cytometer. Analysis on gated populations was performed using FlowJo software (TreeStar).

### Sequencing

Isolation of genomic DNA or RNA, preparation of cDNA, PCR amplification, purification of amplified products, and sequencing reactions were performed as described.<sup>E1</sup> To estimate the proportions of somatically repaired cells, genomic DNA was PCR amplified for 25 cycles, and the purified products cloned using TOPO TA Cloning Kit for Sequencing (Invitrogen). Plasmid DNA was isolated from transformed TOP10 *E. coli* colonies using the PureLink 96 Plasmid Purification System (Invitrogen). Sequencing of at least 56 clones per reaction was analyzed using M13 Forward and Reverse primers. Clones showing germline or repaired sequences were counted, and counts were used to calculate the percentages of diploid cells having germline vs. repaired genotypes. Sequencing was performed by the Genomics Unit of the Rocky Mountain Laboratories Research Technologies Section of the National Institute of Allergy and Infectious Diseases. In some cases, RT-PCR amplified products were visualized by ethidium bromide staining after gel electrophoresis through 1.2% agarose in 1x TAE buffer. Primers used for amplification and sequencing, if not previously published, are listed in Table E2. All genomic variants are described according to Human Genome Variation Society recommendations (<http://www.hgvs.org/mutnomen/recs.html>), using GenBank Reference Sequences NC\_000009.10 (DNA), NM\_001193536.1 (mRNA; previously NM\_203447.1), and

NP\_001180465.1 (protein; previously NP\_982272.1) based upon NCBI Build 37.3. Coding DNA variations are described with the A of the ATG translation initiation codon designated as nucleotide +1.

### Statistical analyses

The Prism 5 software package (GraphPad) was used to calculate *p*-values using Mann-Whitney, Fisher's exact, and Chi square tests, as indicated.

### SUPPLEMENTAL FIGURE LEGENDS

**FIG E1.** *DOCK8* genetic analyses for Patient 1. **A**, Left: Sequencing of genomic DNA from neutrophils or an HVS-transformed T-cell line showed a germline homozygous splicing mutation in exon 11: c.1214A>G, p.K405RfsX15. The same mutation was previously reported in the affected brother who is Patient 2. Right: cDNA sequencing showed that this mutation uses a cryptic splice donor site to cause abnormal splicing. **B**, Sequencing of genomic DNA revealed second-site mutations in exon 11 that abolished the cryptic splice donor site. Left: c.1215G>A, p.K405R in primary T cells, expanded in IL-2 after activation with anti-CD3 plus anti-CD28 antibodies. Right: c.1213A>G, p.K405G in purified NK cells. Black and red arrows designate germline and somatic mutations, respectively. Black and red boxes designate normal and cryptic splice donor consensus site sequences, respectively.

**FIG E2.** *DOCK8* genetic analyses for Patients 6, 7, and 8. Genomic DNA from neutrophils showed homozygous nonsense mutations. **A**, For Patient 6, in exon 19: c.2044G>T, p.E682X. **B**, For Patients 7 and 8, in exon 41: c.5182C>T, p.R1728X. Because of very low frequencies of *DOCK8*-expressing cells, genetic analyses for somatic mutations were not undertaken.

**FIG E3.** *DOCK8* genetic analyses for Patient 9. Genomic DNA isolated from neutrophils or HVS-transformed T cells showed germline compound heterozygous mutations. Representative chromatograms are shown of sequenced cloned PCR-amplified products. **A**, Small indel in exon 19: c.2174\_2175delinsAC>T, p.H725LfsX45. **B**, Missense mutation in exon 44 encoding part of the conserved DHR2 domain: c.5267C>T, p.P1876L. Additional genetic analyses showed that the indel was inherited from mother (data not shown), whereas the missense mutation was presumed inherited from the father (sample unavailable for analysis). See Fig 2, C, which shows that intragenic single crossover was responsible for somatic repair in primary T cells. cDNA sequencing established the parental origin of six exonic SNPs and two mutations, from which a wild-type RNA derived from both maternal (red bars) and paternal (blue bars) alleles could be deduced. For simplicity, only three of the genotyped SNPs are shown in Fig 2, C. The genetic material change by intragenic single crossover was reciprocal, with no change observed by genomic DNA sequencing (data not shown). Markers on cDNA (grey font) are inferred from the markers identified by genomic DNA sequencing (black font).

**FIG E4.** *DOCK8* genetic analyses for Patients 10 and 11. **A**, Genomic DNA isolated from neutrophils showed a germline heterozygous large deletion from exon 21 to the end of the gene by array CGH: Chr9:g.(381,489\_390,404)\_(472,145\_478.814)del in Patient 10 (left), or Chr9:g.(383,073\_383,756)\_(474,634\_474,667)del in Patient 11 using a higher density chip (right). Each plus sign represents a unique probe whose location on the X-axis represents the

$\log_2$ (ratio of fluorescence intensities of patient vs. reference DNA) and whose location on the Y-axis represents the chromosomal location. The shaded area indicates the region of the heterozygous deletion in the *DOCK8* gene. **B**, Representative chromatograms are shown of sequenced cloned PCR-amplified products, which demonstrated a germline small indel in exon 12: c.1266delC, p.W423TfsX18. Additional genetic analyses showed that the large deletion was inherited from the father, whereas the small indel was inherited from the mother (data not shown). **C**, Sequencing of genomic DNA revealed repair of the small indel in primary T cells. See Fig 2, *B*, for genomic DNA sequencing showing gene conversion, in which the maternally-inherited frameshift mutation was repaired by using the intact portion of the truncated paternally-inherited *DOCK8* allele in T cells. This repair generated normal RNA but resulted in loss of heterozygosity in the DNA sequence. Markers on cDNA (grey font) are inferred from the markers identified by genomic DNA sequencing (black font).

**FIG E5.** *DOCK8* genetic analyses for Patient 12. Genomic DNA isolated from neutrophils showed germline compound heterozygous mutations. **A**, Heterozygous large deletion from the promoter to exon 13 by array CGH: Chr9:g.(1\_163,131)\_(368,288\_368,361)del. **B**, Representative chromatogram of sequenced cloned PCR-amplified products, which demonstrated a small indel in exon 32: c.4031\_4032insT, p.D1344RfsX2. Additional genetic analyses showed that the large deletion was inherited from the mother, and the small indel was inherited from the father (data not shown). **C**, Sequencing of genomic DNA from primary T cells showed no changes in the relative proportions of the wildtype and mutant nucleotides (left), or an SNP 3' to this mutation (right). **D**, cDNA sequencing of cloned RT-PCR amplified products from primary T cells, to identify parental origin of a distal exonic SNP relative to the indel. The maternally-derived SNP was disproportionately present in the transcripts (67% of clones). These

findings suggested that somatic repair primarily resulted from intragenic single crossover (left panel). The presence of a minor proportion of transcripts containing paternally-derived SNPs (33% of clones) also suggested intragenic double crossover (right panel), although original-site reversion could not be excluded. Red and blue bars designate maternally- and paternally-derived alleles, respectively, as inferred by the listed SNP and mutations. Hatched bars indicate mRNA.

**FIG E6.** *DOCK8* genetic analyses for Patient 13. Patient 13 has germline compound heterozygous mutations with a large deletion from exons 13 to 26, plus a splicing mutation in exon 5: Chr9:g.(340,142\_356,076)\_(405,056\_416,292)del, plus c.538-18C>G, p.E180VfsX4.<sup>E1</sup>

**A**, Sequencing of genomic DNA revealed no repair of the splicing mutation in primary T cells.

**B**, Schematic diagram showing that either intragenic crossover or gene conversion could account for these results. SNPs between the splicing mutation in exon 5 and the beginning of the deletion in exon 13 are lacking, so it was not possible to directly demonstrate either mechanism by sequencing, and array CGH was not performed to distinguish between the two possibilities. Red and blue bars designate maternally- and paternally-derived alleles, and hatched bars indicate mRNA. Markers on cDNA (grey font) are inferred from the markers identified by genomic DNA sequencing (black font).

**FIG E7.** *DOCK8* genetic analyses for Patients 14 and 15. Genomic DNA isolated from neutrophils showed germline compound heterozygous mutations. **A**, Nonsense mutation in exon 17: c.1805G>A, p.W602X. **B**, Small indel in exon 36: c.4540delG, p.E1514KfsX8. Additional genetic analyses showed that the nonsense mutation was inherited from the mother, and the small indel was inherited from the father (data not shown). **C**, Sequencing of genomic DNA was performed in sorted primary T cells and NK cells to determine the parental origin of two exonic SNPs and the two mutations. One gene conversion event repaired the maternally-inherited

nonsense mutation using the intact portion of the paternally-inherited *DOCK8* allele in T cells. Another gene conversion event repaired the paternally-inherited indel using the intact portion of the maternally-inherited *DOCK8* allele in NK cells. Red and blue bars designate maternally- and paternally-derived alleles, respectively, as inferred by the listed SNPs and mutations. Hatched bars indicate mRNA. Markers on cDNA (grey font) are inferred from the markers identified by genomic DNA sequencing (black font).

**FIG E8.** *DOCK8* genetic analyses for Patients 16 and 17. **A**, Genomic DNA isolated from neutrophils showed a germline heterozygous large deletion from exons 5 to 9 by array CGH and cDNA sequencing in Patient 16: c.325\_921del, p.A109\_K307del. **B**, Agarose gel electrophoresis after RT-PCR amplification of a region encompassing exons 2 to 13 showed a truncated product in primary T cells from both patients, suggesting that Patient 17 carries the same large deletion. **C**, Genomic DNA sequencing also showed a germline heterozygous splicing point mutation in intron 23 in both patients: c.2767-1G>A, p.K924TfsX15. **D**, Agarose gel electrophoresis after RT-PCR amplification of a region encompassing exons 23 and 24 showed an abnormally long spliced product (upper panel). cDNA sequencing of this abnormal product showed partial retention of intron 23 (bottom panel, shaded region). Additional genetic analyses showed that the large deletion was inherited from the mother, whereas the splicing point mutation was inherited from the father (data not shown). **E**, Genomic DNA isolated from primary T cells showed somatic repair of the splicing point mutation in intron 23 in Patient 17 but not Patient 16. **F**, Schematic diagram showing the repair mechanisms used. Because of a high level of *DOCK8*-expressing T cells that still had the deletion and splicing mutations, Patient 16 was inferred as having repaired the splicing mutation by intragenic single crossover. By contrast, Patient 17 was inferred as having repaired the splicing mutation through either gene conversion or original-site

reversion. SNPs between the end of the deletion in exon 9 and the splicing mutation in intron 23 were lacking, so it was not possible to directly demonstrate these mechanisms.

**FIG E9.** Normal TCR V $\beta$  repertoire. TCR V $\beta$  repertoire analyses were performed on purified T cells from four normal controls. Shown are means  $\pm$  SD.

## REFERENCES

- E1. Zhang Q, Davis JC, Lamborn IT, Freeman AF, Jing H, Favreau AJ, et al. Combined immunodeficiency associated with DOCK8 mutations. *N Engl J Med* 2009; 361:2046-55.
- E2. Sanal O, Jing H, Ozgur T, Ayvaz D, Strauss-Albee DM, Ersoy-Evans S, et al. Additional diverse findings expand the clinical presentation of DOCK8 deficiency. *J Clin Immunol* 2012; 32:698-708.
